# Supplementary material for: Galvanic replacement mediated morphological adjustments boost nanoparticle performance in electrocatalytic alcohol oxidation
Source: Royal Society of Chemistry journal article supplement (doi:10.1039/d4cc06525e), 2025-01-01
Supplement: d4cc06525e1.pdf [file d4cc06525e1.pdf]

## **Supporting Information**

### **Galvanic replacement mediated morphological adjustments boost nanoparticle performance in electrocatalytic alcohol oxidation**

Dongze Ma, Jin Zhao\*, Jianfeng Jia\*

College of New Energy and Materials Engineering, Shanxi Electronic Science and Technology  
University, Linfen, China

#### **Corresponding Author**

E-mail: zhaojin@sxdzkj.edu.cn (J Zhao)

jiajf@dns.sxnu.edu.cn (J.-F Jia)

## Experimental section

### 1. Materials Synthesis

**Materials and reagents.** Oleylamine (OAm, C18: 80-90%) was bought from Aladdin Biochemical Technology Co., Ltd. Cobalt(II) acetylacetonate ( $C_{10}H_{16}CoO_4$ ) and platinum acetylacetonate ( $C_{10}H_{14}O_4Pt$ ) were purchased from J&K Scientific Co., Ltd. Absolute ethanol, n-Hexane and hydrochloric acid (HCl) were received from Sinopharm Chemical Reagent Co., Ltd. Hexadecyltrimethylammonium bromide (CTAB) was bought from Adamas. All chemicals and materials used in this study were obtained from commercial suppliers and were directly used without purification. The water used in all experiments was ultrapure ( $18.25\text{ M}\Omega\cdot\text{cm}^{-1}$ ).

**Preparation of  $Pt_{47}Co_{53}$  Alloy.** In the synthesis process, 40 mg of  $Pt(acac)_2$ , 20 mg of  $Co(acac)_2$ , and 500 mg of CTAB were added to a flask containing 50.0 mL of OAm. The flask was then sealed and stirred at  $60^\circ\text{C}$  for 4 hours to obtain a homogeneous solution. The resulting light yellow solution was transferred to a stainless steel Teflon-lined autoclave and subjected to solvothermal reaction in a constant temperature forced-air drying oven at  $180^\circ\text{C}$  for 8 h. After the reaction was completed, the product was repeatedly washed by centrifugation with ethanol and n-hexane. The centrifuged product was then dispersed in 10 mL of ultrapure water and 10 mL of anhydrous ethanol for subsequent use.

**Preparation of  $Pd_xPt_yCo_z$ .** The product dispersed in a mixture of ultrapure water and anhydrous ethanol (volume ratio of 1:2) is subjected to ultrasonic treatment for 30 minutes. Anhydrous ethanol is used during the dispersion process to ensure the effective removal of residual organic solvents and to prevent the aggregation of nanoparticles. Followed by rapid addition of 200  $\mu\text{L}$  of 0.05 M  $H_2PdCl_4$ , and then sonicated at room temperature for 30 minutes. The product was separated by centrifugation at 8000 rpm/min, washed several times with ethanol, and vacuum dried at  $60^\circ\text{C}$  for 8 h. By varying the amount of  $H_2PdCl_4$  (400  $\mu\text{L}$ , 600  $\mu\text{L}$ , and 800  $\mu\text{L}$  of 0.05 M  $H_2PdCl_4$ ), catalysts with compositions of  $Pd_5Pt_{46}Co_{49}$ ,  $Pd_{12}Pt_{43}Co_{45}$ , and  $Pd_{23}Pt_{47}Co_{30}$  were obtained, respectively.

### 2. Characterization.

The morphology of as-prepared samples was studied by using transmission electron

microscopy (TEM) on a Talos F200X, USA and high-angle angular dark-field scanning transmission electron microscopy (HAADF-STEM) on a ARM200F. X-ray diffraction patterns (XRD) patterns of samples were examined by X-ray diffraction on a Rigaku MLtina IV-185 X-ray diffractometer using Cu K $\alpha$  radiation in a region of  $2\theta = 10-90^\circ$ , operating with a scanning rate of  $10^\circ \text{ min}^{-1}$ . X-ray photoelectron spectroscopy (XPS) measurements were carried out on a ESCALAB-210 using an Al K $\alpha$  X-ray source. The mass loadings of metal on the UCN were measured by inductively coupled plasma-optical emission spectroscopy (ICP-OES) on a PerkinElmer 8300.

### 3. Electrochemical Measurements.

All electrochemical tests were performed on the CHI 760E electrochemical analyzer at room temperature. A three-electrodes system was used for all electrochemical tests, in which glassy carbon electrode (GCE,  $0.1256 \text{ cm}^2$ ) was used as the working electrode, a carbon rod as the counter electrode, and a Hg/HgO electrode as the reference electrode. An ink of the catalysts was prepared by mixing 3 mg of nanocatalysts, 7 mg of Valcan XC-72 carbon, 700  $\mu\text{L}$  of isopropanol and 300  $\mu\text{L}$  of  $\text{H}_2\text{O}$ . After that, 50  $\mu\text{L}$  of Nafion solution (5 wt. % in isopropanol and  $\text{H}_2\text{O}$ ) was added and sonicated for 0.5 h. Then, 6  $\mu\text{L}$  of above-prepared ink solution was dropped on the GCE electrode and dried at room temperature before test. The cyclic voltammograms (CVs) were then scanned until the stabilized curves were obtained for further removal of the surfactant in 1.0 M KOH. The EOR tested with a scan rate of  $50 \text{ mV s}^{-1}$  at room temperature in 1.0 M KOH + 1.0 M  $\text{CH}_3\text{CH}_2\text{OH}$ , other alcohols were tested as above.

In addition, the ECSA of the catalysts was further analyzed by CV plots and calculated in the region of the PdO/PtO $_x$  reduction peak as follows:

$$ECSA = \frac{Q_{redox}}{Q_{ref} \cdot m}$$

For Pd/Pt catalysts, the PdO reduction peaks are typically at 0.4 - 0.6 V vs. RHE, and the PtO $_x$  reduction peaks are typically at 0.5 - 0.8 V vs. RHE. Integrate the reduction peaks to obtain the redox charge  $Q_{redox}$ . Pd:  $Q_{ref} = 405 \mu\text{C}/\text{cm}^2$ , Pt:  $Q_{ref} = 420 \mu\text{C}/\text{cm}^2$ . Specifically,  $Q_{redox}$ : charge of the hydrogen desorption or redox peak (C).  $m$ : loading of Pd or Pt on the electrode (mg).

**Product Analysis:** Chronoamperometry experiments were conducted at 0.9 V vs. RHE, with an

electrolysis duration of 7 h, aiming to identify the products resulting from polyalcohol oxidation and subsequently compute the corresponding selectivity and faradaic efficiencies. The products were analyzed by  $^1\text{H}$  nuclear magnetic resonance (NMR).  $^1\text{H}$  NMR spectra were recorded on an Avance III HD 600MHz (Bruker). 50  $\mu\text{L}$   $\text{D}_2\text{O}$  and 10  $\mu\text{L}$  dimethyl sulfoxide (DMSO) used as internal standard were added to 0.5 mL electrolyte. The concentration of products was calculated based on the equation given below:

$$C_{\text{product}} = \frac{A_{\text{product}}}{A_{\text{DMSO}}} \times \frac{N_{\text{DMSO}}}{N_{\text{product}}} \times C_{\text{DMSO}} \quad (1)$$

Where  $C_{\text{product}}$  is the concentration of the liquid product,  $N_{\text{product}}$  and  $N_{\text{DMSO}}$  are the number of protons for the individual NMR peak of the liquid product and DMSO, respectively, and  $C_{\text{DMSO}}$  is the concentration of DMSO.

Taking ethylene glycol oxidation as an example, the selectivity of product is calculated by the following equation:

$$\text{Selectivity}_{\text{glycolate}} = \frac{C_{\text{glycolate}}}{C_{\text{glycolate}} + C_{\text{formate}}} \times 100\% \quad (2)$$

The Faradaic efficiency was calculated using Equation:

$$\text{Faradaic Efficiency} = (n \times z \times F/Q) \times 100\% \quad (3)$$

where  $n$  is the yield of product (mol),  $z$  is the number of electrons required to form a molecule of product,  $Q$  is the total amount of charge consumed during the i-t test (C), and  $F$  is the Faraday constant ( $96485 \text{ C mol}^{-1}$ ).

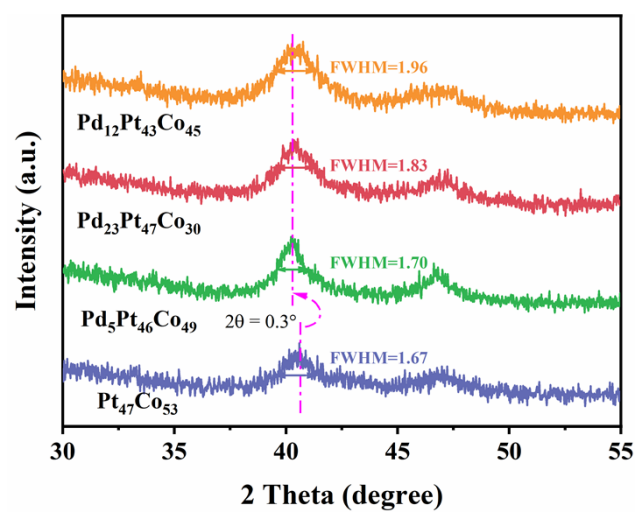

Fig. S1 Partial magnification of XRD.

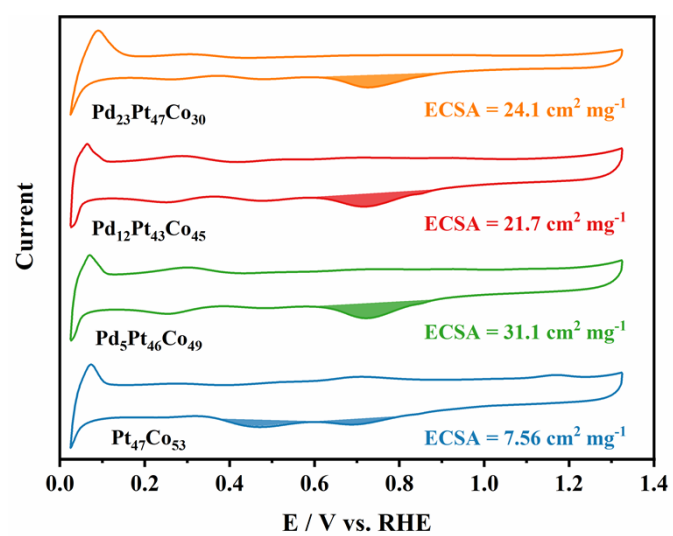

Fig. S2 CV curve in 1.0 M KOH solution.

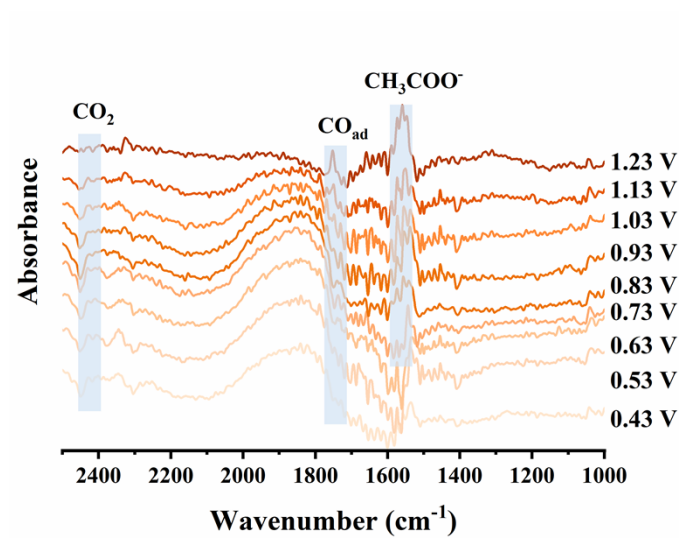

Fig. S3 FTIR image of  $\text{Pd}_{12}\text{Pt}_{43}\text{Co}_{45}$  tested in 1.0 M KOH + 1.0 M ethanol solution.

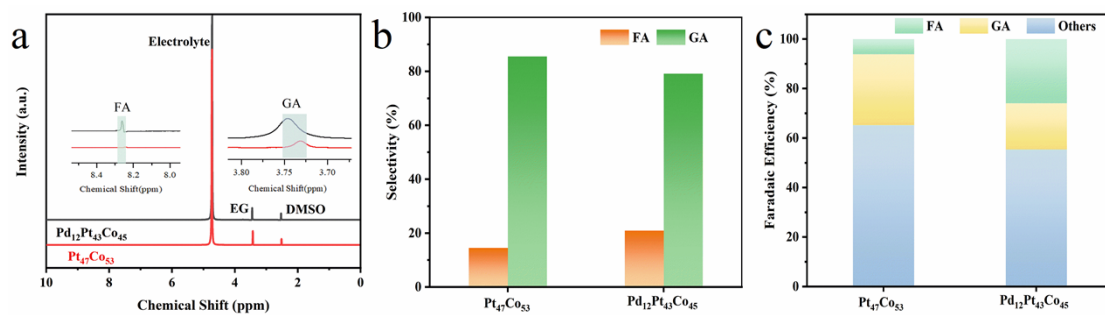

Fig. S4 (a)  $^1\text{H}$  NMR-spectrum of the products analysis test of  $\text{Pd}_{12}\text{Pt}_{43}\text{Co}_{45}$  and  $\text{Pt}_{47}\text{Co}_{53}$  towards EGOR at 0.9 V vs. RHE in electrolyte after completing 7-hour electrolysis. Comparison of products (b) selectivity values and (c) faraday efficiency.



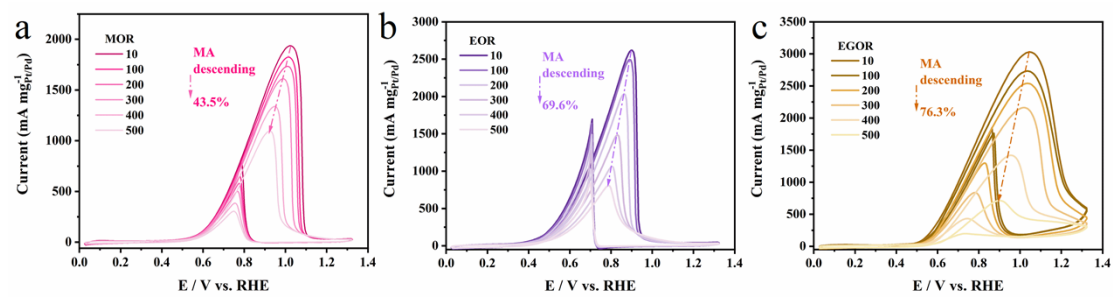

Fig. S5 Stability of Pt<sub>43</sub>Co<sub>57</sub> in 1.0 KOH + 1.0 M ethanol solution.

Table S1. Comparisons of EGOR activity of Pd<sub>12</sub>Pt<sub>43</sub>Co<sub>45</sub> with previously reported the-state-of-the-art Pd/Pt based catalysts.

| Catalysts                                          | Electrolyte |        | Mass Activity<br>(A mg <sup>-1</sup> ) | Ref.                                          |
|----------------------------------------------------|-------------|--------|----------------------------------------|-----------------------------------------------|
|                                                    | KOH (M)     | EG (M) |                                        |                                               |
| Pd <sub>12</sub> Pt <sub>43</sub> Co <sub>45</sub> | 1.0         | 1.0    | 3.90                                   | This work                                     |
| PtCu nanospheres (NSs)                             | 1.0         | 1.0    | 2.15                                   | J. Colloid Interface Sci. 2019, 551, 81       |
| Pd/CoO-NiO                                         | 1.0         | 1.0    | 2.98                                   | Electrochim. Acta 2022, 408, 139965           |
| PdNiRuNSs                                          | 1.0         | 1.0    | 3.86                                   | Nano Research 2024, 17, 3777                  |
| Pd/CoTe                                            | 1.0         | 1.0    | 3.92                                   | J. Colloid Interface Sci., 2022, 616, 316-325 |
| Doughnut-shaped Pd-Bi <sub>2</sub> Te <sub>3</sub> | 1.0         | 1.0    | 2.42                                   | Inorg. Chem., 2022, 61(10), 4533-4540         |
| Pd <sub>1</sub> Ni <sub>1</sub> HNs                | 1.0         | 1.0    | 3.15                                   | Electrochimica Acta, 2008, 268, 383-391       |
| Pt <sub>81</sub> Rh <sub>19</sub> NDs              | 0.5         | 0.5    | 1.5                                    | J. Colloid Interf. Sci., 2020, 579, 250-257   |
| PtRuPd NSs                                         | 0.5         | 0.5    | 1.368                                  | J. Colloid Interf. Sci., 2020, 560, 467-474   |
| AuPt core-shell structures                         | 1.0         | 0.75   | 0.973                                  | Electrochim. Acta, 2015, 180, 1075-1084       |
| PdPt nanowire                                      | 0.5         | 0.5    | 3.37                                   | Energy Environ. Sci., 2015, 8, 2910-2915      |
| Pt <sub>3</sub> Mn                                 | 0.5         | 0.5    | 0.24                                   | Appl. Catal. B-Environ., 2019, 253, 11-20     |
| PtRh <sub>0.02</sub> @Rh                           | 0.1         | 0.5    | 1.25                                   | J. Mater. Chem. A, 2022, 10, 20571-20579      |
| Pt-Co EDNC                                         | 0.5         | 0.5    | 2.5                                    | Appl. Catal. B- Environ., 2019, 258, 117951   |
